# Supplementary material for: Dehydrogenation studies of the bimetallic borohydrides
Source: Royal Society of Chemistry journal article supplement (doi:10.1039/c4ra10352a), 2014-11-18
Supplement: c4ra10352a1.pdf [file c4ra10352a1.pdf]

## Supplementary Information

### Dehydrogenation Studies of the Bimetallic Borohydrides

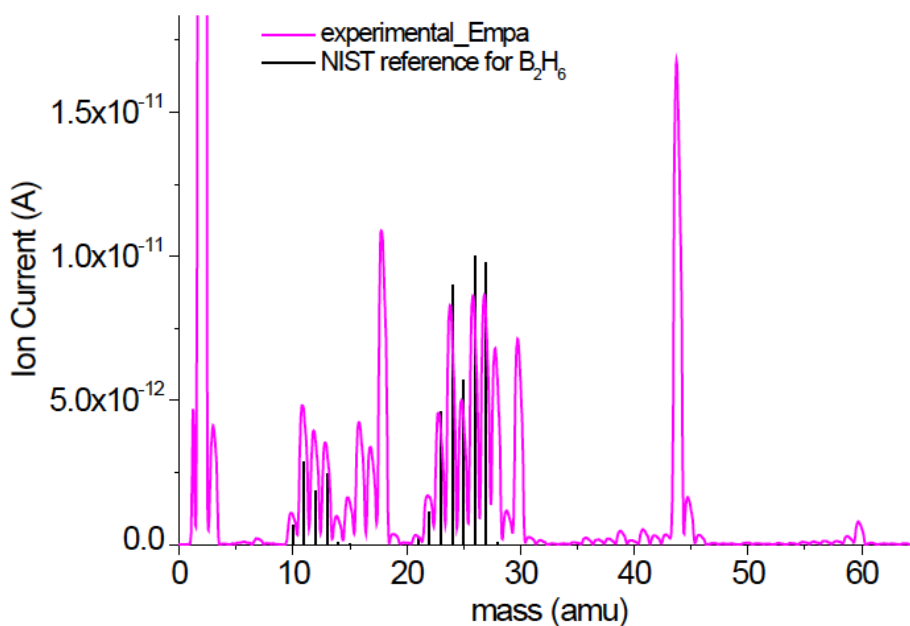

Fig. S1 Mass spectrometry data for LiSc(BH<sub>4</sub>)<sub>4</sub> decomposed at 453 K. The only products detected were H<sub>2</sub> at 2 amu and B<sub>2</sub>H<sub>6</sub> at 10-13 amu and 21-29 amu. Contaminant species were also detected at 18 amu (H<sub>2</sub>O) and 42 amu (CO<sub>2</sub>).
